# Supplementary material for: Conjugates of Ultrasmall Quantum Dots and Acridine Derivatives as Prospective Nanoprobes for Intracellular Investigations
Source: MDPI journal article supplement (doi:10.3390/nano11092160), 2021-08-24
Supplement: s1 [file s1]

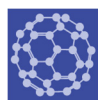

## Supplementary Materials

# Conjugates of Ultrasmall Quantum Dots and Acridine Derivatives as Prospective Nanoprobes for Intracellular Investigations

Pavel Linkov <sup>1,2</sup>, Pavel Samokhvalov <sup>1</sup>, Maria Baryshnikova <sup>1,3</sup>, Marie Laronze-Cochard <sup>4</sup>, Janos Sapi <sup>4</sup>, Alexander Karaulov <sup>5</sup> and Igor Nabiev <sup>1,2,5,\*</sup>

- <sup>1</sup> Laboratory of Nano-Bioengineering, National Research Nuclear University MEPhI (Moscow Engineering Physics Institute), 31 Kashirskoe Highway, 115409 Moscow, Russia; palinkov@mephi.ru (P.L.); p.samokhvalov@gmail.com (P.S.); ma\_ba@mail.ru (M.B.)
- <sup>2</sup> Laboratoire de Recherche en Nanosciences, LRN-EA4682, Université de Reims Champagne-Ardenne, 51 Rue Cognacq Jay, 51100 Reims, France; igor.nabiev@univ-reims.fr
- <sup>3</sup> Laboratory of Experimental Diagnostics and Biotherapy of Cancer, N.N. Blokhin Russian Cancer Research Center, 24 Kashirskoe Highway, 115478 Moscow, Russia
- <sup>4</sup> Institut de Chimie Moléculaire de Reims, Université de Reims Champagne-Ardenne, 51 Rue Cognacq Jay, 51100 Reims, France; marie.cochard@univ-reims.fr (M.L.-C.); janos.sapi@univ-reims.fr (J.S.)
- <sup>5</sup> Laboratory of Immunopathology, Department of Clinical Immunology and Allergology Sechenov First Moscow State Medical University (Sechenov University), 8-2 Trubetskaya Str., 119991 Moscow, Russia; drkaraulov@mail.ru (A.K.)
- \* Correspondence: igor.nabiev@univ-reims.fr

## Figures

**Citation:** Linkov, P.; Samokhvalov, P.; Baryshnikova, M.; Laronze-Cochard, M.; Sapi, J.; Karaulov, A.; Nabiev, I. Conjugates of Ultrasmall Quantum Dots and Acridine Derivatives as Prospective Nanoprobes for Intracellular Investigations. *Nanomaterials* **2021**, *11*, 2160. <https://doi.org/10.3390/nano11092160>

Academic Editor: Zili Sideratou

Received: 10 July 2021

Accepted: 20 August 2021

Published: 24 August 2021

**Publisher's Note:** MDPI stays neutral with regard to jurisdictional claims in published maps and institutional affiliations.

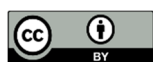

**Copyright:** © 2021 by the authors. Submitted for possible open access publication under the terms and conditions of the Creative Commons Attribution (CC BY) license (<http://creativecommons.org/licenses/by/4.0/>).

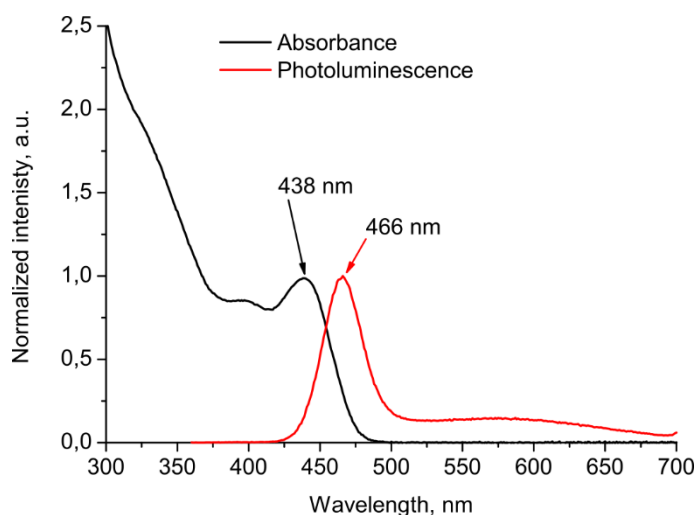

**Figure S1.** Absorbance and photoluminescence spectra of ~1.8 nm core CdSe nanocrystals.

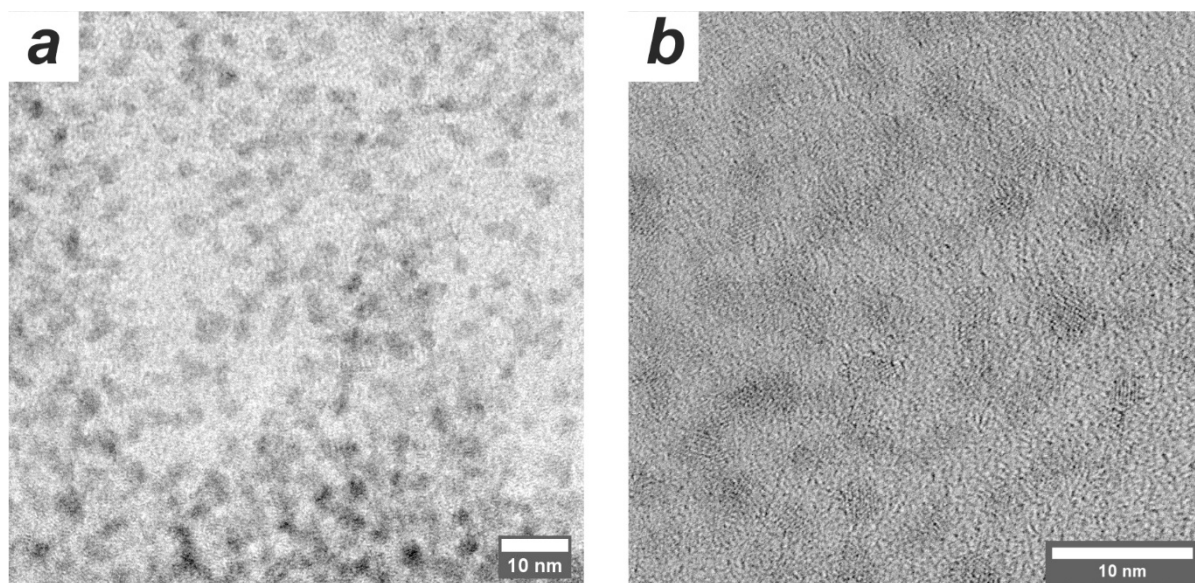

**Figure S2.** TEM and HRTEM images of CdSe/ZnS QDs. Panel a – TEM image; panel b – HRTEM image.
